# Supplementary material for: Insight into heavy metal chemical fractions in ash collected from municipal and industrial waste incinerators in northern Vietnam
Source: Royal Society of Chemistry journal article supplement (doi:10.1039/d4ra01465k), 2024-01-01
Supplement: d4ra01465k1.pdf [file d4ra01465k1.pdf]

**Table S1** Information on waste incinerators collected in some provinces in the North of Vietnam

| TT | Sample site | Samples | IC (ton/h) | AOT (h/year) | Type of waste                                                                       |
|----|-------------|---------|------------|--------------|-------------------------------------------------------------------------------------|
| 1  | Bac Ninh 1  | IW1     | 5,00       | 8,03×103     | 100% municipal waste (plastic, packaging, food waste)                               |
| 2  | Hai Phong 1 | IW2     | 1,00       | 7,30×1000    | 100% municipal waste (plastic, packaging, food waste)                               |
| 3  | Ha Noi      | IW3     | 4,50       | 8,03×1000    | 100% municipal waste (plastic, packaging, food waste)                               |
| 4  | Hai Phong 2 | IW4     | 1,00       | 7,30×1000    | 100% municipal waste (plastic, packaging, food waste)                               |
| 5  | Bac Ninh 2  | IW5     | 5,00       | 8,03×1000    | 100% industrial waste (such as nylon, cloth, paper, pressed mud, plastic, chemical) |
| 6  | Bac Giang   | IW6     | 3,00       | 8,03×1000    | 100% industrial waste (such as nylon, cloth, paper, pressed mud, plastic, chemical) |
| 7  | Hai Duong   | IW7     | 2,50       | 8,03×103     | 100% industrial waste (such as nylon, cloth, paper, pressed mud, plastic, chemical) |

*IC=Incineration Capacity; AOT= Average operating time.*

**Table S2** Total concentrations of heavy metals in waste incinerators (mg/kg)

| Samples           | Concentration (mg/kg) |       |      |      |       |      |      |      |       |      |       |      |      | Total carbon (TC) (g/kg) | Oranic carbon (OC) (g/kg) |
|-------------------|-----------------------|-------|------|------|-------|------|------|------|-------|------|-------|------|------|--------------------------|---------------------------|
|                   | As                    | SD    | Cd   | SD   | Cu    | SD   | Cr   | SD   | Pb    | SD   | Zn    | SD   | PH   |                          |                           |
| Fly ash (n=21)    |                       |       |      |      |       |      |      |      |       |      |       |      |      |                          |                           |
| IW1               | 29.5                  | 6.18  | 10.0 | 1.75 | 1560  | 108  | 749  | 92.5 | 2231  | 12.9 | 2631  | 335  | 9.09 | 12.9                     | 8.76                      |
| IW2               | 101                   | 30.9  | 6.82 | 1.55 | 57.83 | 15.2 | 276  | 32.8 | 3014  | 99.1 | 1012  | 279  | 10.3 | 14.3                     | 4.23                      |
| IW3               | 5.65                  | 0.66  | 98.4 | 20.3 | 1257  | 600  | 756  | 120  | 1942  | 28.3 | 2960  | 507  | 11.2 | 17.6                     | 5.76                      |
| IW4               | 32.0                  | 4.54  | 5.62 | 2.10 | 1236  | 210  | 796  | 107  | 3201  | 34.2 | 3681  | 306  | 10.5 | 11.3                     | 3.24                      |
| IW5               | 19.0                  | 7.46  | 5.41 | 1.99 | 1286  | 201  | 815  | 98.3 | 1920  | 56.3 | 2978  | 214  | 9.84 | 22.7                     | 9.01                      |
| IW6               | 9.03                  | 2.03  | 5.75 | 1.33 | 3171  | 70.2 | 315  | 76.8 | 1052  | 12.5 | 3081  | 602  | 9.71 | 23.1                     | 7.87                      |
| IW7               | 19.3                  | 8.03  | 14.6 | 4.59 | 1989  | 120  | 953  | 213  | 1826  | 6.11 | 3322  | 432  | 8.97 | 14.7                     | 12.1                      |
| Mean              | 30.8                  | 8.55  | 21.0 | 4.81 | 1508  | 189  | 666  | 106  | 2169  | 35.6 | 2809  | 382  | 9.94 | 16.7                     | 7.28                      |
| Bottom ash (n=21) |                       |       |      |      |       |      |      |      |       |      |       |      |      |                          |                           |
| IW1               | 12.4                  | 3.19  | 5.82 | 3.87 | 1876  | 221  | 694  | 106  | 2406  | 38.9 | 2238  | 700  | 10.7 | 25.7                     | 10.2                      |
| IW2               | 48.3                  | 12.8  | 7.64 | 2.68 | 304.1 | 54.2 | 348  | 109  | 2050  | 25.2 | 606.4 | 211  | 12.3 | 31.6                     | 18.5                      |
| IW3               | 3.02                  | 0.598 | 8.23 | 2.24 | 3508  | 302  | 1510 | 301  | 1210  | 15.3 | 1847  | 493  | 12.5 | 38.2                     | 14.2                      |
| IW4               | 8.70                  | 0.584 | 7.32 | 2.58 | 2387  | 149  | 322  | 43.6 | 1998  | 46.3 | 2697  | 652  | 9.72 | 28.9                     | 21.3                      |
| IW5               | 7.70                  | 1.23  | 3.31 | 1.14 | 1317  | 164  | 802  | 67.7 | 1662  | 10.1 | 1741  | 74.7 | 10.9 | 65.1                     | 50.9                      |
| IW6               | 12.5                  | 4.34  | 6.71 | 3.27 | 1391  | 77.3 | 867  | 289  | 1005  | 29.4 | 2126  | 407  | 12.8 | 43.8                     | 12.4                      |
| IW7               | 8.67                  | 1.21  | 8.20 | 3.42 | 2750  | 252  | 881  | 188  | 949.2 | 7.30 | 2311  | 632  | 10.0 | 30.4                     | 22.2                      |
| Mean              | 14.5                  | 3.68  | 6.75 | 2.96 | 1933  | 196  | 775  | 149  | 1612  | 26.6 | 1938s | 552  | 11.3 | 37.7                     | 21.4                      |

*SD: standard deviation; TC: Total carbon in ash; OC: Oranic carbon*

**Table S3** Daily intake and non-carcinogenic risk (HI) of heavy metals in fly ash and bottom ash from waste incinerators

| Fly ash              |                 |                 |                 |                 |                 |                 |
|----------------------|-----------------|-----------------|-----------------|-----------------|-----------------|-----------------|
| <i>Child</i>         | <b>As</b>       | <b>Cd</b>       | <b>Cu</b>       | <b>Cr</b>       | <b>Pb</b>       | <b>Zn</b>       |
| ID <sub>ing</sub>    | 3.94E-04        | 2.68E-04        | 1.93E-02        | 8.51E-03        | 2.77E-02        | 3.59E-02        |
| ID <sub>inh</sub>    | 1.10E-08        | 7.51E-09        | 5.41E-07        | 2.39E-07        | 7.78E-07        | 1.01E-06        |
| ID <sub>dermal</sub> | 1.10E-06        | 7.50E-07        | 5.40E-05        | 2.38E-05        | 7.77E-05        | 1.01E-04        |
| HQ <sub>ing</sub>    | 1.31E+00        | 5.36E-01        | 4.82E-01        | 2.84E+00        | 7.92E+00        | 1.20E-01        |
| HQ <sub>inh</sub>    | 3.68E-05        | 1.50E-05        | 1.35E-05        | 8.35E-03        | 2.21E-04        | 3.36E-06        |
| HQ <sub>dermal</sub> | 3.68E-03        | 1.32E-02        | 4.50E-03        | 3.97E-01        | 1.48E-01        | 1.68E-03        |
| <i>HI = ΣHQ</i>      | 1.32E+00        | 5.48E-01        | 4.86E-01        | 3.16E+00        | 8.05E+00        | 1.21E-01        |
| <i>Adult</i>         |                 |                 |                 |                 |                 |                 |
| ID <sub>ing</sub>    | 4.22E-05        | 2.87E-05        | 2.07E-03        | 9.12E-04        | 2.97E-03        | 3.85E-03        |
| ID <sub>inh</sub>    | 3.97E-09        | 2.70E-09        | 1.94E-07        | 8.58E-08        | 2.80E-07        | 3.62E-07        |
| ID <sub>dermal</sub> | 1.68E-07        | 1.15E-07        | 8.24E-06        | 3.64E-06        | 1.19E-05        | 1.54E-05        |
| HQ <sub>ing</sub>    | 1.41E-01        | 5.74E-02        | 5.16E-02        | 3.04E-01        | 8.49E-01        | 1.28E-02        |
| HQ <sub>inh</sub>    | 1.32E-05        | 5.40E-06        | 4.84E-06        | 3.00E-03        | 7.95E-05        | 1.21E-06        |
| HQ <sub>dermal</sub> | 5.61E-04        | 2.01E-03        | 6.87E-04        | 6.07E-02        | 2.26E-02        | 2.56E-04        |
| <i>HI = ΣHQ</i>      | <b>1.41E-01</b> | <b>5.94E-02</b> | <b>5.23E-02</b> | <b>3.68E-01</b> | <b>8.72E-01</b> | <b>1.31E-02</b> |
| Bottom ash           |                 |                 |                 |                 |                 |                 |
| <i>Child</i>         | As              | Cd              | Cu              | Cr              | Pb              | Zn              |
| ID <sub>ing</sub>    | 1.85E-04        | 8.63E-05        | 2.47E-02        | 9.91E-03        | 2.06E-02        | 2.48E-02        |
| ID <sub>inh</sub>    | 5.19E-09        | 2.42E-09        | 6.93E-07        | 2.78E-07        | 5.78E-07        | 6.95E-07        |
| ID <sub>dermal</sub> | 5.18E-07        | 2.42E-07        | 6.92E-05        | 2.77E-05        | 5.77E-05        | 6.94E-05        |
| HQ <sub>ing</sub>    | 6.17E-01        | 1.73E-01        | 6.18E-01        | 3.30E+00        | 5.89E+00        | 8.26E-02        |
| HQ <sub>inh</sub>    | 1.73E-05        | 4.84E-06        | 1.72E-05        | 9.72E-03        | 1.64E-04        | 2.32E-06        |
| HQ <sub>dermal</sub> | 1.73E-03        | 4.24E-03        | 5.77E-03        | 4.62E-01        | 1.10E-01        | 1.16E-03        |
| <i>HI = ΣHQ</i>      | 6.18E-01        | 1.76E-01        | 6.23E-01        | 3.70E+00        | 5.99E+00        | 8.36E-02        |
| <i>Adult</i>         |                 |                 |                 |                 |                 |                 |
| ID <sub>ing</sub>    | 1.98E-05        | 9.24E-06        | 2.65E-03        | 1.06E-03        | 2.21E-03        | 2.66E-03        |
| ID <sub>inh</sub>    | 1.87E-09        | 8.70E-10        | 2.49E-07        | 9.99E-08        | 2.08E-07        | 2.50E-07        |
| ID <sub>dermal</sub> | 7.91E-08        | 3.69E-08        | 1.06E-05        | 4.24E-06        | 8.81E-06        | 1.06E-05        |
| HQ <sub>ing</sub>    | 6.61E-02        | 1.85E-02        | 6.62E-02        | 3.54E-01        | 6.31E-01        | 8.85E-03        |
| HQ <sub>inh</sub>    | 6.22E-06        | 1.74E-06        | 6.20E-06        | 3.49E-03        | 5.90E-05        | 8.33E-07        |
| HQ <sub>dermal</sub> | 2.64E-04        | 6.47E-04        | 8.81E-04        | 7.06E-02        | 1.68E-02        | 1.77E-04        |
| <i>HI = ΣHQ</i>      | 6.64E-02        | 1.91E-02        | 6.71E-02        | 4.28E-01        | 6.48E-01        | 9.03E-03        |

*ID<sub>ing</sub>*: daily intake through ingestion, *ID<sub>inh</sub>*: daily intake through inhalation, *ID<sub>dermal</sub>*: daily intake through skin contact  
*HQ<sub>ing/inh/dermal</sub>*: HQ represents the hazard quotient through ingestion, inhalation, and skin contact  
*HI*: Non-carcinogenic risk ( $HI = \Sigma HQ_{ing/inh/dermal}$ )

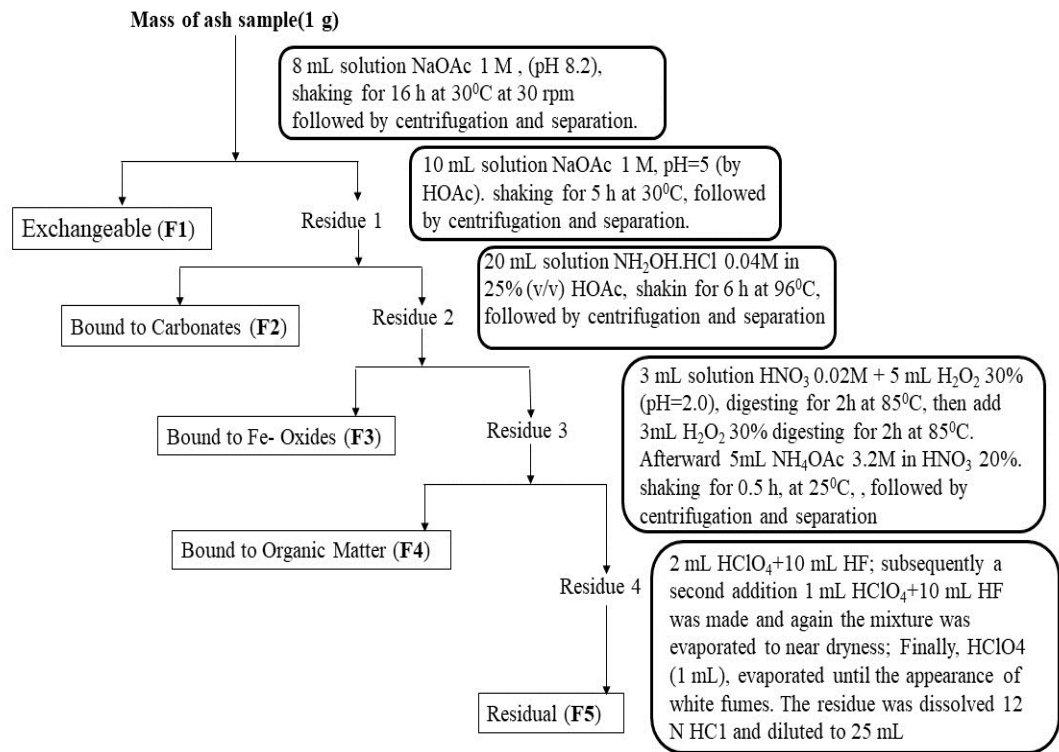

**Fig S1** Tessier sequential extraction procedure

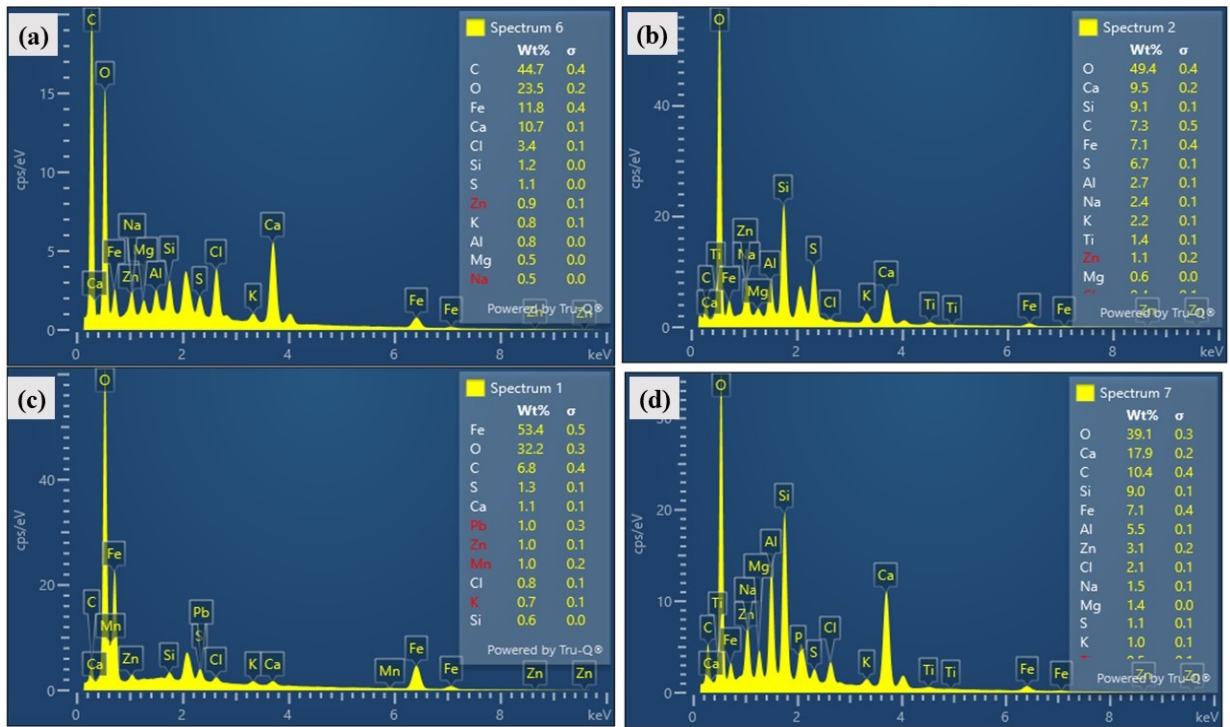

**Fig S2** The EDX spectrum with major peaks of fly ash and bottom ash collected from industrial (a,c) and municipal (b,d) waste incinerators
